# Supplementary material for: Efficient resolution of 3-aryloxy-1,2-propanediols using CLEA-YCJ01 with high enantioselectivity
Source: Royal Society of Chemistry journal article supplement (doi:10.1039/c9ra01103j), 2019-01-01
Supplement: c9ra01103j1.pdf [file c9ra01103j1.pdf]

## Supplementary Material

### Results according to Table 5

Substrate 1 3-phenoxy-1,2-propanediol

Retention time: *R*- substrate 11.3 min, *S*- substrate 10.2 min; *R*-monoacetate 7.7 min, *S*-monoacetate 6.1 min; *R*-diacetate 5.5 min, *S*-diacetate 4.8 min.

Substrate 2 3-(4-methylphenoxy)-1,2-propanediol

Retention time: *R*- substrate 13.2 min, *S*- substrate 12.2 min; *R*-monoacetate 9.2 min, *S*-monoacetate 7.8 min; *R*-diacetate 5.9 min, *S*-diacetate 5.1 min.

Substrate 3 3-(2-methylphenoxy)-1,2-propanediol

Retention time: *R*- substrate 13.8 min, *S*- substrate 12.6 min; *R*-monoacetate 10.1 min, *S*-monoacetate 8.6 min; *R*-diacetate 6.7 min, *S*-diacetate 5.8 min.

Substrate 4 3-(2-methylphenyl)-1,2-propanediol

Retention time: *R*- substrate 9.8 min, *S*- substrate 8.8 min; *R*-monoacetate 6.0 min, *S*-monoacetate 4.9 min; *R*-diacetate 3.8 min, *S*-diacetate 3.0 min.

Substrate 5 3-(3-methylphenyl)-1,2-propanediol

Retention time: *R*- substrate 10.0 min, *S*- substrate 8.9 min; *R*-monoacetate 6.2 min, *S*-monoacetate 5.0 min; *R*-diacetate 4.1 min, *S*-diacetate 3.2 min.

Substrate 6 3-(4-methylphenyl)-1,2-propanediol

Retention time: *R*- substrate 9.4 min, *S*- substrate 8.3 min; *R*-monoacetate

5.5 min, *S*-monoacetate 4.4 min; *R*-diacetate 3.5 min, *S*-diacetate 2.7 min.
